# Isolation of oligotrophic yeasts from supraglacial environments of different altitude on the Gulkana Glacier (Alaska)

Jun Uetake<sup>1,2</sup>, Yoshitaka Yoshimura<sup>3</sup>, Naoko Nagatsuka<sup>4</sup> & Hiroshi Kanda<sup>2</sup>

<sup>1</sup>Transdisciplinary Research Integration Center, Tokyo, Japan; <sup>2</sup>National Institute of Polar Research, Tokyo, Japan; <sup>3</sup>Graduate School of Agriculture, Tamagawa University, Tokyo, Japan; and <sup>4</sup>Graduate School of Science, Chiba University, Chiba, Japan

**Correspondence:** Dr Jun Uetake, National Institute of Polar Research, C306 10-3 Midoricho, Tachikawa, Tokyo 190-8518, Japan. Tel.: +81 42 512 0768; fax: +81 42 528 3492; e-mail: juetake@nipr.ac.jp

Received 4 April 2011; revised 23 January 2012; accepted 26 January 2012.  
Final version published online 19 March 2012.

DOI: 10.1111/j.1574-6941.2012.01323.x

Editor: Philippe Lemanceau

## Keywords

psychrophilic; yeast; glacier; oligotrophic.

## Abstract

Psychrophilic yeasts have been isolated from supra- and subglacial ice at many sites worldwide. To understand the ecology of psychrophilic yeasts on glaciers, we focused on their adaptation to wide range of nutrient concentrations and their distribution with altitude on the Gulkana Glacier in Alaska. We found various culturable psychrophilic yeasts on the ice surfaces of the glacier, and 11 species were isolated with incubation at 4 °C in four different dilutions of agar medium. Some of our isolated species (*Rhodotorula psychrophenolica*, *Rhodotorula* aff. *psychrophenolica*, *Rhodotorula glacialis*, and *Basidiomycota* sp. 1) can grow on the low dissolved organic matter (DOC) concentrations medium (7.6 mg L<sup>-1</sup>) which is close to the typical level of supraglacial melt water, suggesting that these species can inhabit in any supraglacial meltwater. Otherwise, most of other species were isolated only from higher DOC concentration medium (183 mg L<sup>-1</sup>–18.3 g L<sup>-1</sup>), suggesting that these are inhabitant around the cryoconite, because DOC concentrations in melted surface-ice contained cryoconite is much higher than in melted water. Similarity of altitudinal distribution between culturable yeast and algal biomass suggests that the ecological role played by the cold-adapted yeasts is as organic matter decomposers and nutrient cyclers in glacier ecosystem.

## Introduction

For many years, glacial environments were believed to be virtually abiotic. However, recent studies have shown that glaciers are biotic environments containing many psychrophilic organisms (Hodson *et al.*, 2008), including snow algae (Kol, 1969; Hoham & Duval, 2001), cyanobacteria (Takeuchi, 2001), yeasts (Turchetti *et al.*, 2008), bacteria (Segawa *et al.*, 2005; Simon *et al.*, 2009), invertebrates (Kohshima, 1984), metazoans (DeSmet & Van Rompu, 1994), and protozoa (Sävström *et al.*, 2002). A large number of studies of psychrophilic yeasts on glaciers are currently being conducted. Psychrophilic yeasts have been isolated from supra- and subglacial ice in Svalbard (Butinar *et al.*, 2007), from Austrian glacial ice (Margesin *et al.*, 2007, 2009); Italian subglacial meltwater (Buzzini *et al.*, 2005); supra- and subglacial ice and meltwater of the Italian Alps (Turchetti *et al.*, 2008; Thomas-Hall *et al.*, 2009); glacial and subglacial waters

from northwest Patagonia (Brizzio *et al.*, 2007; De García *et al.*, 2007), Antarctica (Thomas-Hall *et al.*, 2009), and an Antarctic deep ice core (Amato *et al.*, 2009). These isolates can grow and degrade phenol (Margesin *et al.*, 2007) and organic macromolecules (Buzzini *et al.*, 2005) at low temperatures (1–4 °C), and also exhibit extracellular enzymatic activity (Brizzio *et al.*, 2007; De García *et al.*, 2007; Turchetti *et al.*, 2008). Isolates from deep ice cores have been shown to be metabolically active, displaying H<sup>3</sup>-leucine incorporation under frozen conditions (–5 °C) (Amato *et al.*, 2009). Although various studies have been carried out on isolated fungi from glacial environments, there is little information on the ecology of these organisms, such as their adaptation to low-nutrient and cold supraglacial environments.

To understand the ecology of psychrophilic yeasts on glaciers, we focused on their adaptation to a wide range of nutrient concentrations and altitudes on the Gulkana Glacier in Alaska. The Gulkana Glacier is a small

mountain glacier with a length of approximately 4 km and an area of around 21.8 km<sup>2</sup>. The glacier has been monitored since 1960s by the University of Alaska and the United States Geological Survey (<http://ak.water.usgs.gov/glaciology/gulkana/>), and is easily accessible by vehicle from the Richardson Highway. It flows west to south from Icefall Peak (~2440 m asl) to its termination at ~1220 m asl. The snow line on 29 August 2008 was around 1750 m asl by visual observation. The altitudinal distributions of snow algae and bacteria and the spectral reflectivity of biogenic materials (red-colored snow-algal cells and cryoconite) on this glacier have been reported previously (Takeuchi, 2001, 2009; Segawa *et al.*, 2010).

## Materials and methods

### Sampling

Snow and ice were sampled at five sites on the Gulkana Glacier in Alaska (S1, 1270 m asl; S2, 1385 m asl; S3, 1470 m asl; S4, 1585 m asl; and S5, 1680 m asl) between 29 August and 2 September 2008 (Fig. 1). Five samples were collected from randomly selected points at each sampling site. Snow and ice from the surface to a depth of 1 cm were directly collected into 50-mL sterile centrifuge tubes. The centrifuge tubes were transported to the

National Institute of Polar Research (NIPR), Japan. The samples for yeast isolation were transported on ice (0 °C) during the full transportation process, whereas the samples for molecular cloning and chemical analysis were transferred to a freezer (−20 °C) on 3 September for transport in a freezer cargo plane.

### Isolation of yeasts and yeast cell concentrations

Aliquots of 20–50 µL of the melted samples were inoculated onto yeast extract peptone dextrose (YEPD) agar medium, YEPD agar medium diluted 10-fold (1/10 YEPD), YEPD agar medium diluted 100-fold (1/100 YEPD), and ultrapure water agar (UWA) medium within a class 100 laminar-flow clean bench. For all media, the agar was mixed with ultrapure water. The cultures were incubated at 4 °C for 2–5 weeks (Butinar *et al.*, 2007; De García *et al.*, 2007; Turchetti *et al.*, 2008; Branda *et al.*, 2010). All media contained 2% agar (010-08725; Wako Pure Chemical Industries, Osaka, Japan) and chloramphenicol (100 mg L<sup>−1</sup>) to prevent the growth of prokaryotes. Colonies were selected for isolation based on macromorphology (small, 1–2 mm; medium, 3–4 mm; or large, 5–6 mm), taking care to isolate all morphotypes represented on each medium at different incubation

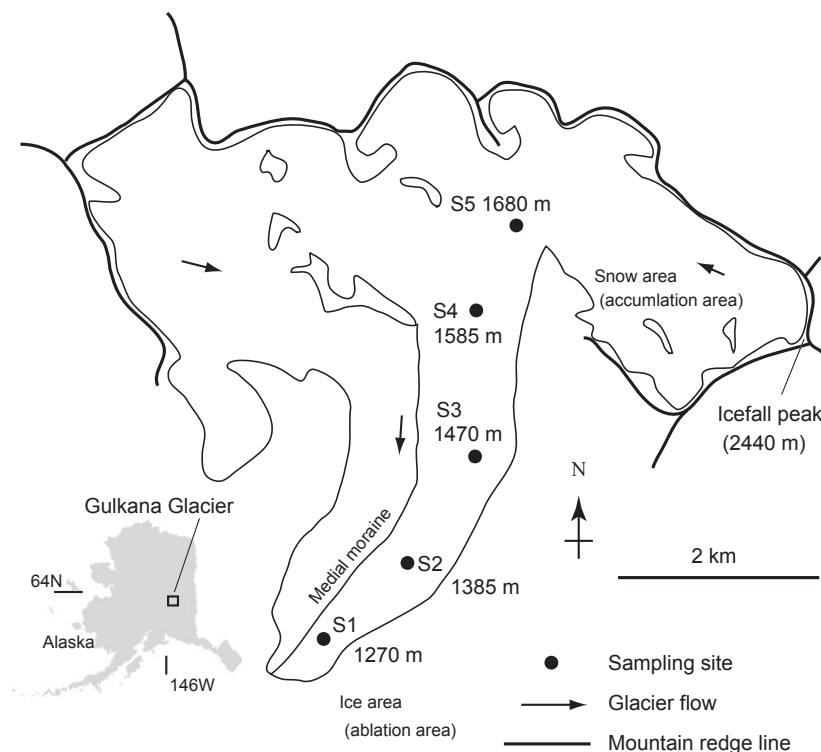

**Fig. 1.** Map of the Gulkana Glacier, Alaska. Solid circles show the locations of the sampling sites.

mediums. After first incubation, the colonies on each medium were subcultured onto new medium, to purify the isolates. Isolate had not been deposited in culture collection and kept frozen with glycerol in laboratory. After incubation for 2–5 weeks, all the colonies were counted, and the total numbers of colonies were expressed as colony-forming units (CFU) mL<sup>-1</sup>. Multiple comparisons were made between the sampling sites, using the Tukey–Kramer test.

### Genetic analysis of isolated yeasts and environmental samples

The 26S ribosomal RNA (rRNA) D1/D2 domains of the isolated strains were amplified. All manipulations before PCR analysis were made within a class 100 laminar-flow clean bench, to avoid contamination. A colony was selected from each agar medium with a sterile pipette tip and added directly to the PCR mixture or extracted with a Dr GenTLE<sup>®</sup> (from Yeast) High Recovery Kit (Takara Bio, Shiga, Japan). PCR amplification was performed with Ex Taq DNA polymerase (Takara Bio) for 35 cycles, using the primer pair NL1 (5'-GCATATCAATAAGCGGAG-GAAAAG-3') and NL4 (5'-GGTCCGTGTTTCAAGACGG-3'). The PCR products from the isolates were sequenced with the 3130xl Genetic Analyzer (Applied Biosystems, Carlsbad, CA) at NIPR. The DNA sequences were aligned with CLUSTALW in the Geneious 4.5.2 software. Neighbor-joining analysis was performed, and bootstrap consensus trees (1000 pseudo-replicates) were generated with Mega 4.0.2. Strains were identified by comparing the sequences obtained with the GenBank database. Strains that differed from the closest related type strain by two or fewer nucleotides in the D1/D2 region were considered to be the same species (Fell *et al.*, 2000).

### Chemical analysis

The concentration of dissolved organic carbon (DOC) was measured in YEPD agar medium diluted 500-fold (1/500 YEPD) and in the nutrient eluted supernatant of the 10% UWA medium using a Spectroquant test kit (Merck, Darmstadt, Germany) and a spectral photometer (phot-Lab S12; Wissenschaftlich-Technische Werkstätten, Weilheim, Germany). All samples and media were filtered through a polycarbonate membrane (K040A047A; Advantec, CA). The nutrient eluted supernatant of the 10% UWA agar medium was collected after shaking (110 r.p.m.) for 24 h, according to Uzuka (1992). The melted surface-ice samples were mixed from two aliquots of samples from four sites (S1, S2, S4, and S5) and from three aliquots of samples from one site (S3) to achieve the volumes required for analysis.

## Results and discussion

### Isolation of cold-adapted yeast

Fifty-nine yeast strains were isolated from the ice and snow samples collected from the glacier surface and incubated at 4 °C in four different agar media (Table 1). The number of isolates obtained from each agar medium was as follows: 10 strains from YEPD, 26 strains from 1/10 YEPD, 17 strains from 1/100 YEPD, and six strains from UWA. The D1/D2 domain of the 26S rRNA gene sequence analysis of 59 yeast strains allowed them to be assigned to 11 species (Fig. 2, Table 1): *Rhodotorula psychrophenolica* (five strains), *Rhodotorula aff. psychrophenolica* (10 strains), *Rhodotorula glacialis* (three strains), *Dioszegia hungarica* (one strain), *Mrakia sp.*, *Basidiomycota sp. 1* (five strains), *Basidiomycota sp. 2* (10 strains), *Basidiomycota sp. 3* (10 strains), *Basidiomycota sp. 4* (five strains), *Basidiomycota sp. 5* (one strain), and *Basidiomycota sp. 6* (one strain), and their nucleotide sequences have been deposited in the GenBank database under accession numbers AB558439–AB558455 and AB671320–AB671328.

*Rhodotorula psychrophenolica* and *Rhodotorula glacialis* are closely related to the strain from glacier cryoconite in Austrian glacier (Margesin *et al.*, 2007) and *Rhodotorula aff. psychrophenolica* is 3–5 nucleotides different from *Rhodotorula psychrophenolica* strain A12 (EF151256). In Gulkana Glacier, glacier surface in research area was covered by cryoconite and supposed to be similar environment to Austrian glacier. *Mrakia sp.* has 100% similarity with many species of genus *Mrakia* (*Mrakia frigida*, *Mrakia robertii*, and *Mrakia sp.*) and not possible to determine the species by analysis of 26S rRNA D1/D2 domains. *Dioszegia hungarica* is closely related to the strain from glacial outflow meltwater river (De García *et al.*, 2007), cloud water, soil, and malt with 99% similarity.

*Basidiomycete sp. 1* and *sp. 2* are closely related to uncultured clone (AB474392) from ice core in Russian glacier with 96–99% similarity, respectively. This uncultured clone was retrieved from snow layer which is affected by meltwater percolation during summer time, and Uetake *et al.* (2011) showed evidence for the propagation of these yeast from a low-DOC (maximum of 8.3 mg L<sup>-1</sup>) contained snow in ablation area. *Basidiomycota sp. 3* are closely related to Antarctic yeast CBS 8941 (AY040647), which is isolated from Antarctica with 99–100% similarity. *Basidiomycota sp. 4* are closely related to *Basidiomycota sp. CRUB 1733* (FJ841888), which are isolated from Patagonian glacier with 100% similarity. *Basidiomycota sp. 5* and *6* are undescribed species, because closest relatives of these species are far from GenBank (*Basidiomycota sp. CRUB 1733*: FJ841888 with

**Table 1.** Physical appearance of the colonies (color and diameter) of 11 species isolated from this study in each growth mediums at five sites (S1–S5) on the Gulkana Glacier. The physical appearances of the colonies are defined as follows: W, white; C, cream; R, red; O, orange; S, small; M, medium; L, large

| Species                                  | Medium    | Sample site |            |        |    |        |
|------------------------------------------|-----------|-------------|------------|--------|----|--------|
|                                          |           | S1          | S2         | S3     | S4 | S5     |
| <i>Rhodotorula psychrophenolica</i>      | YEPD      |             |            |        |    |        |
|                                          | YEPD1/10  |             |            |        |    | WM     |
|                                          | YEPD1/100 |             |            |        |    | WM     |
| <i>Rhodotorula aff. psychrophenolica</i> | UWA       |             |            |        |    | CM     |
|                                          | YEPD      | WM          | WM         |        |    |        |
|                                          | YEPD1/10  |             | WM         | WM     |    |        |
| <i>Rhodotorula glacialis</i>             | YEPD1/100 | WM, WL      |            |        |    | WM, CM |
|                                          | UWA       | WS          | WS         | WS     |    |        |
|                                          | YEPD      |             |            |        |    |        |
| <i>Dioszegia hungarica</i>               | YEPD1/10  |             |            |        | WM |        |
|                                          | YEPD1/100 |             |            | WL     |    |        |
|                                          | UWA       |             |            |        | WS |        |
| <i>Mrakia</i> sp.                        | YEPD      | OM          |            |        |    |        |
|                                          | YEPD1/10  |             |            |        |    |        |
|                                          | YEPD1/100 |             |            |        |    |        |
| <i>Basidiomycota</i> sp. 1               | UWA       |             |            |        |    |        |
|                                          | YEPD      |             |            | WL     | WL |        |
|                                          | YEPD1/10  | WL          | WL         | WL     | WL |        |
| <i>Basidiomycota</i> sp. 2               | YEPD1/100 |             | WL, CL     |        |    |        |
|                                          | UWA       |             |            |        |    |        |
|                                          | YEPD      |             |            |        |    |        |
| <i>Basidiomycota</i> sp. 3               | YEPD1/10  |             |            | CM     | CM |        |
|                                          | YEPD1/100 |             |            | WM, CM |    |        |
|                                          | UWA       |             |            |        |    | WS     |
| <i>Basidiomycota</i> sp. 4               | YEPD      |             |            |        |    | WS, RM |
|                                          | YEPD1/10  | RM          | RM         | WS, RM |    | WS, RM |
|                                          | YEPD1/100 |             |            | WM     |    | WS     |
| <i>Basidiomycota</i> sp. 5               | UWA       |             |            |        |    |        |
|                                          | YEPD      |             |            |        | CM | CM     |
|                                          | YEPD1/10  |             | CM, CL, RM |        |    | CM, RM |
| <i>Basidiomycota</i> sp. 6               | YEPD1/100 |             | WM         |        |    | CM     |
|                                          | UWA       |             |            |        |    |        |
|                                          | YEPD      |             |            |        | WS |        |
| <i>Basidiomycota</i> sp. 7               | YEPD1/10  | WS          | WS         |        |    |        |
|                                          | YEPD1/100 | WS          |            |        | WS |        |
|                                          | UWA       |             |            |        |    |        |
| <i>Basidiomycota</i> sp. 8               | YEPD      |             |            |        |    |        |
|                                          | YEPD1/10  |             |            |        |    |        |
|                                          | YEPD1/100 |             |            | WS     |    |        |
| <i>Basidiomycota</i> sp. 9               | UWA       |             |            |        |    |        |
|                                          | YEPD      |             |            |        |    |        |
|                                          | YEPD1/10  |             |            |        |    |        |
| <i>Basidiomycota</i> sp. 10              | YEPD1/100 |             |            | WS     |    |        |
|                                          | UWA       |             |            |        |    |        |
|                                          | YEPD      |             |            |        |    |        |
| <i>Basidiomycota</i> sp. 11              | YEPD1/10  |             |            |        |    |        |
|                                          | YEPD1/100 |             |            | WS     |    |        |
|                                          | UWA       |             |            |        |    |        |

96% similarity and *Zymoxenogloea eriophori* strain CBS8387: AF189905 with 95% similarity, respectively).

Clearly, the colony color of both *Basidiomycota* sp. 2 and *Basidiomycota* sp. 3 includes three types of color (red, cream, and white) (Table 1). Pigmentation may be for resistance from strong UV on surraglacial environ-

ment; however, the reason why different color mixed in same specie is unknown. Pigmentation is one of the common physiological features of the isolate (Margesin & Miteva, 2011), and difference of color can divide more strains. But further genetic analysis using ITS region may be helpful for the identification of strain.

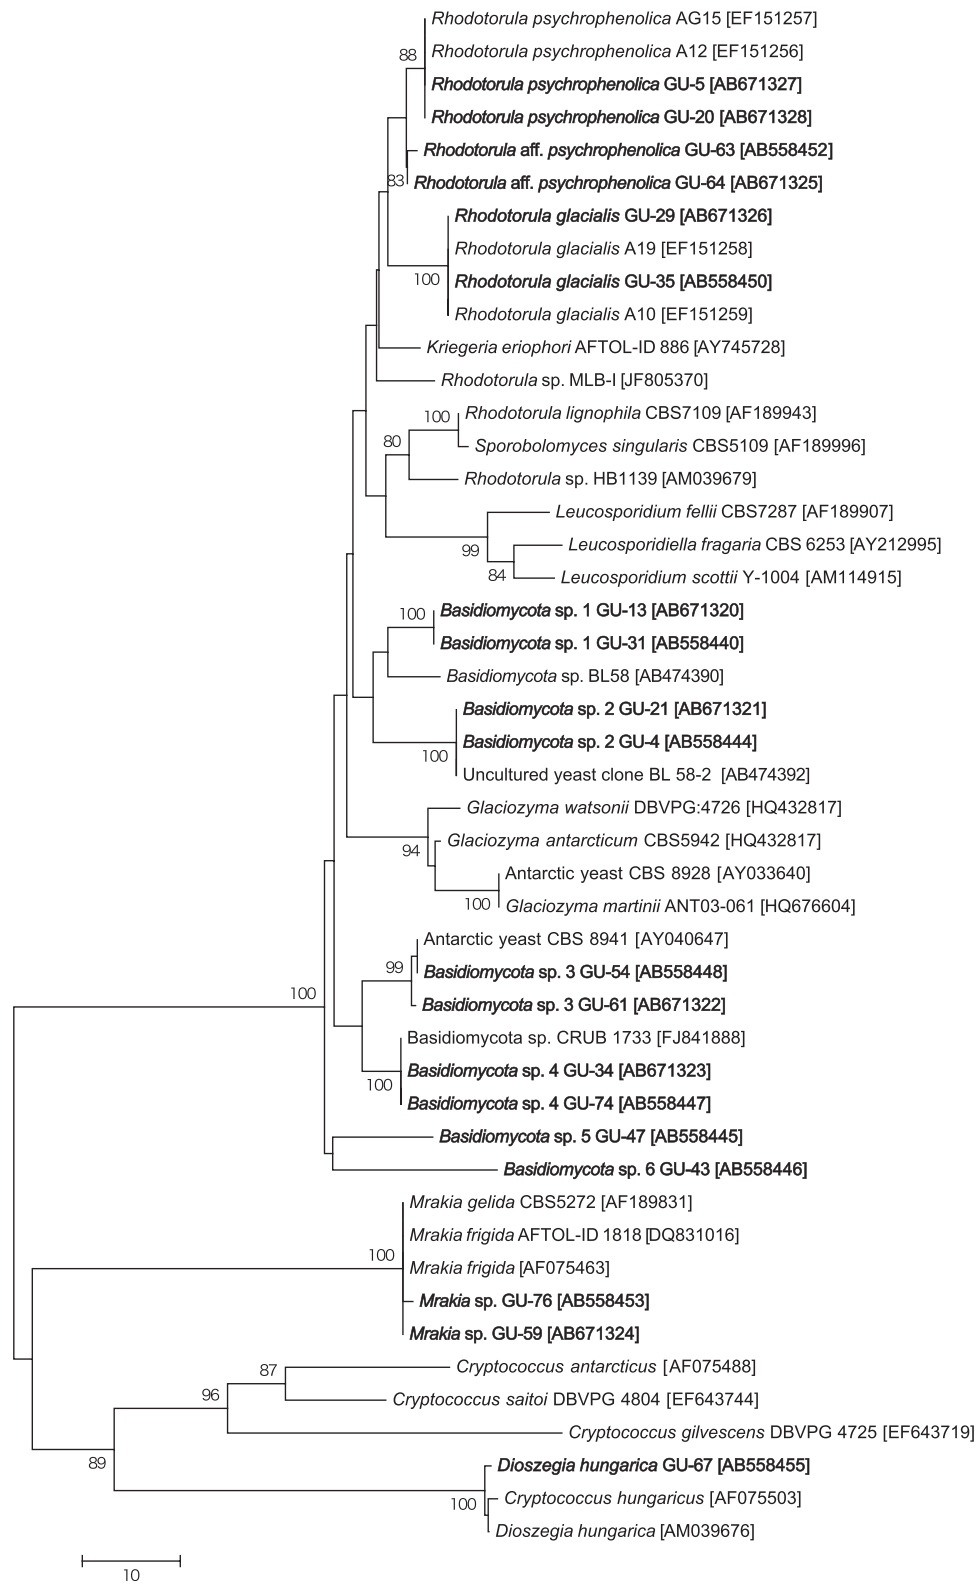

**Fig. 2.** Phylogenetic placement of the isolates and clones calculated with the neighbor-joining method applied to the 26S rRNA D1/D2 domain sequences. The scale indicates the number of substitutions accumulated every 100 nucleotides. Bootstrap values higher than 80% are shown (1000 replicates).

### Growth in wide range of DOC concentrations

All species which can be retrieved more than three strains are able to grow on wide range of nutrient condition (Table 1). For example, *Rhodotorula psychrophenolica* was isolated from three different mediums (YEPD1/10, YEPD1/100, and UWA) in S5. The estimated concentrations of DOC in 2% UWA and 1/100 YEPD were 7.6 and 183 mg L<sup>-1</sup>, respectively. (These values were estimated from measured concentration of 10% UWA (37.8 mg L<sup>-1</sup>) and 1/500 YEPD (36.6 mg L<sup>-1</sup>.) Therefore, DOC concentration of mediums which we used for this study covered from 7.6 to 18300 mg L<sup>-1</sup>.

The DOC concentration of the supraglacial environment is reported to be 0.252 mg L<sup>-1</sup> on the John Evans Glacier (Barker *et al.*, 2006), 1.3 ± 0.52 mg L<sup>-1</sup> in Werenkioldbreen (Stibal *et al.*, 2008) in the Arctic, 1.9–3.9 mg L<sup>-1</sup> in cryoconite hole water in the glaciers around Dry Valley (Foreman *et al.*, 2007), 5.897 mg L<sup>-1</sup> in the Victoria Upper Glacier in Antarctica (Barker *et al.*, 2006), 0.188–0.303 mg L<sup>-1</sup> in the Outre Glacier in Canada (Barker *et al.*, 2006), and 0.275–1.052 mg L<sup>-1</sup> on Chinese high-altitude glaciers (Liu *et al.*, 2009).

These DOC concentrations are usually recognized as representing oligotrophic environments; however, Priscu *et al.* (1999) estimated from a study of subglacial lake ice that a DOC level of 1.2 mg L<sup>-1</sup> is adequate to support heterotrophic growth. Therefore, lowest-DOC-contained UWA is most closed to supraglacial condition (cryoconite hole water, meltwater, and melted ice) and sustainable for yeast growth. Some of our isolate adapt to this oligotrophic condition, because four of 11 species (*Rhodotorula psychrophenolica*, *Rhodotorula* aff. *psychrophenolica*, *Rhodotorula glacialis*, and *Basidiomycota* sp. 1) can grow on the UWA. Therefore, species retrieved from UWA are able to grow in any water environment on/in glacier.

Otherwise, most of other species were isolated from higher DOC concentration medium (YEPD, YEPD1/10, YEPD1/100). YEPD1/100 is estimated 183 mg L<sup>-1</sup> and much higher than meltwater and melted ice. We had analyzed the DOC concentrations in melted surface-ice contained much of cryoconite. DOC concentrations were much higher (5.5–770 mg L<sup>-1</sup>) than typical supraglacial meltwater described earlier, probably attributable to lysis from cryoconite. Because the samples that we analyzed had experienced many freeze–thaw cycles before analysis, the cytoplasm of the microorganisms and other organic contents in cryoconite would be lysed by this process. Although we had not measured the DOC from cryoconite contained water, in the near surface or inside of cryoconite, DOC concentration may be locally higher than other supraglacial melted water environment; therefore, species

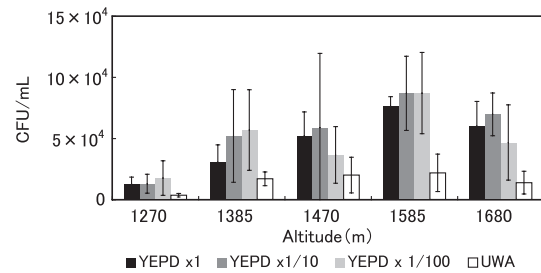

**Fig. 3.** Altitudinal distributions of yeasts (CFU mL<sup>-1</sup>) in four different dilutions of YEPD medium: YEPD, 1/10 YEPD, 1/100 YEPD, and UWA 2%. The agar medium contained chloramphenicol (100 mg L<sup>-1</sup>) to prevent the growth of prokaryotes.

adapted to high DOC concentration could inhabit around the cryoconite.

### Altitudinal distributions of the yeasts

The altitudinal distributions of yeasts, in terms of CFU mL<sup>-1</sup>, on the ice of the glacier surface ranged from 1.3 × 10<sup>4</sup> (S1) to 8.7 × 10<sup>4</sup> (S4) in YEPD medium, from 1.3 × 10<sup>4</sup> (S1) to 8.7 × 10<sup>4</sup> (S4) in 1/10 YEPD medium, from 1.7 × 10<sup>4</sup> (S1) to 8.7 × 10<sup>4</sup> (S4) in 1/100 YEPD medium, and from 3.5 × 10<sup>3</sup> (S1) to 2.1 × 10<sup>4</sup> (S4) in UWA medium (Fig. 3). The yeast CFU in YEPD medium at S1 were significantly lower ( $P < 0.01$ ) than those at S3, S4, and S5. And CFU in both 1/10 YEPD and 1/100 YEPD media were lower ( $P < 0.05$ ) than those at S4.

The altitudinal distributions of yeast CFU differed from those calculated with direct bacterial counts on the same glacier (Segawa *et al.*, 2010). The altitudinal distributions of bacterial cell concentrations were highest at the lowest altitude (S1). In contrast, yeast cell concentration at the same site was not significantly higher than at the other sites. Segawa *et al.* (2010) showed that most bacteria at S1 were of a peri-glacial environmental origin and had been transported onto the glacier by the wind, because the number of singletons (sequences unique among the entire 16S rRNA gene clone library constructed from a glacial sample) at S1 was much higher than at the other altitudes.

On the other hand, the similar altitudinal distribution of snow-algal biomass has been reported for the Gulkana Glacier and other Alaskan glaciers (Takeuchi, 2001; Takeuchi *et al.*, 2003). Both yeast CFU and algal biomass are higher in the higher altitude. Takeuchi (2001) reported that the amount of meltwater could wash out the snow algae near the glacier termination; therefore, biomass increased with increasing altitude on the ice area. While we were at the Gulkana Glacier between 29 August and 2 September 2008, we saw many surface meltwater streams around S1 and S2. Therefore, wash-out by meltwater

would also affect the populations of yeasts that inhabit the glacier.

Similarity of altitudinal distribution between culturable yeast and algal biomass may show that ecological relationship on the glacial ecosystem. Ecological role played by psychrophilic yeasts is as organic matter decomposers and nutrient cyclers, because many studies showed the ability of extracellular enzymatic activity of psychrophilic yeast (Margesin *et al.*, 2003, 2007; Brizzio *et al.*, 2007; De García *et al.*, 2007; Turchetti *et al.*, 2008). Therefore, psychrophilic yeast species on glacier are distributed with snow algae as a primary producer in the supraglacial ecosystem. However, our altitudinal data refer only to the short period of the melting season. To better understand the ecology of cold-adapted yeasts, we must analyze the DOC concentrations in fresh samples with long-term observation and sampling of the glacier.

## Acknowledgements

We thank Mr Watanabe for DNA sequencing, Ms Suga for the isolation and maintenance of the yeast strains and Dr De García for comments about taxonomy. This research was partially supported by the Ministry of Education, Science, Sports and Culture, a Grant-in-Aid for Young Scientists (B) 20710020, and the 'Environmental and Genetic Approach to Life on Earth' project of the Transdisciplinary Research Integration Center and National Institute of Polar Research publication subsidy.

## References

- Amato P, Doyle S & Christner BC (2009) Macromolecular synthesis by yeasts under frozen conditions. *Environ Microbiol* **11**: 589–596.
- Barker J, Sharp M, Fitzsimons S & Turner R (2006) Abundance and dynamics of dissolved organic carbon in glacier systems. *Arct Antarct Alp Res* **38**: 163–172.
- Branda E, Turchetti B, Diolaiuti G, Pecci M, Smiraglia C & Buzzini P (2010) Yeast and yeast-like diversity in the southernmost glacier of Europe (Calderone Glacier, Apennines, Italy). *FEMS Microbiol Ecol* **72**: 354–369.
- Brizzio S, Turchetti B, de García V, Libkind D, Buzzini P & van Broock M (2007) Extracellular enzymatic activities of basidiomycetous yeasts isolated from glacial and subglacial waters of northwest Patagonia (Argentina). *Can J Microbiol* **53**: 519–525.
- Butinar L, Spencer-Martins I & Gunde-Cimerman N (2007) Yeasts in high Arctic glaciers: the discovery of a new habitat for eukaryotic microorganisms. *Antonie Van Leeuwenhoek* **91**: 277–289.
- Buzzini P, Turchetti B, Diolaiuti G, D'Agata C, Martini A & Smiraglia C (2005) Culturable yeasts in meltwaters draining from two glaciers in the Italian Alps. *Ann Glaciol* **40**: 119–122.
- De García V, Brizzio S, Libkind D, Buzzini P & van Broock M (2007) Biodiversity of cold-adapted yeasts from glacial meltwater rivers in Patagonia, Argentina. *FEMS Microbiol Ecol* **59**: 331–341.
- DeSmet WH & Van Rompu EA (1994) Rotifera and tardigrada from some cryoconite holes on a Spitzbergen (Svalbard) glacier. *Belg J Zool* **124**: 27–37.
- Fell JW, Boekhout T, Fonseca A, Scorzetti G & Stätzell-Tallman A (2000) Biodiversity and systematics of basidiomycetous yeasts as determined by large-subunit rDNA D1/D2 domain sequence analysis. *Int J Syst Evol Microbiol* **50**: 1351–1371.
- Foreman CM, Sattler B, Mikucki JA, Porazinska DL & Priscu JC (2007) Metabolic activity and diversity of cryoconites in the Taylor Valley, Antarctica. *J Geophys Res* **112**: G04S32. doi: 10.1029/2006JG000358.
- Hodson A, Anesio A, Tranter M, Fountain A, Osborn M, Priscue J, Laybourn-Parry J & Sattler B (2008) Glacial Ecosystems. *Ecol Monogr* **78**: 41–67.
- Hoham RW & Duval B (2001) Microbial ecology of snow and freshwater ice. *Snow Ecology* (Jones HG, Pomeroy JW, Walker DA & Hoham RW eds), pp. 168–228. Cambridge University Press, Cambridge.
- Kohshima S (1984) A novel cold-tolerant insect found in a Himalayan glacier. *Nature* **310**: 225–227.
- Kol E (1969) The red snow of Greenland. II. *Acta Bot Acad Sci Hung* **15**: 281–289.
- Liu Y, Yao T, Jiao N, Kang S, Xu B, Zeng Y, Huang S & Liu X (2009) Bacterial diversity in the snow over Tibetan Plateau Glaciers. *Extremophiles* **13**: 411–423.
- Margesin R & Miteva V (2011) Diversity and ecology of psychrophilic microorganisms. *Res Microbiol* **162**: 346–361.
- Margesin R, Gander S, Zacke G, Gounot AM & Schinner F (2003) Hydrocarbon degradation and enzyme activities of cold-adapted bacteria and yeasts. *Extremophiles* **7**: 451–458.
- Margesin R, Fonteyne PA, Schinner F & Sampaio JP (2007) *Rhodotorula psychrophila* sp. nov., *Rhodotorula psychrophilica* sp. nov. and *Rhodotorula glacialis* sp. nov., novel psychrophilic basidiomycetous yeast species isolated from alpine environments. *Int J Syst Evol Microbiol* **57**: 2179–2184.
- Margesin R, Jud M, Tscherko D & Schinner F (2009) Microbial communities and activities in alpine and subalpine soils. *FEMS Microbiol Ecol* **67**: 208–218.
- Priscu JC, Adams EE, Lyons WB *et al.* (1999) Geomicrobiology of subglacial ice above Lake Vostok, Antarctica. *Science* **286**: 2141–2144.
- Sävström C, Mumford P, Marshall W, Hodson A & Laybourn-Parry J (2002) The microbial communities and primary productivity of cryoconite holes in an Arctic glacier (Svalbard 79 N). *Polar Biol* **25**: 591–596.
- Segawa T, Miyamoto K, Ushida K, Agata K, Okada N & Kohshima S (2005) Seasonal change in bacterial flora and biomass in mountain snow from the Tateyama Mountains, Japan, analyzed by 16S rRNA gene sequencing and real-time PCR. *Appl Environ Microbiol* **71**: 123–130.

- Segawa T, Takeuchi N, Ushida K, Kanda H & Kohshima S (2010) Altitudinal changes in a bacterial community on Gulkana Glacier in Alaska. *Microbes Environ* **25**: 171–182.
- Simon C, Wiezer A, Strittmatter AW & Rolf D (2009) Phylogenetic diversity and metabolic potential revealed in a glacier ice metagenome. *Appl Environ Microbiol* **75**: 7519–7526.
- Stibal M, Tranter M, Telling J & Benning LG (2008) Speciation, phase association and potential bioavailability of phosphorus on a Svalbard glacier. *Biogeochemistry* **90**: 1–13.
- Takeuchi N (2001) The altitudinal distribution of snow algae on an Alaskan glacier (Gulkana Glacier in the Alaska Range). *Hydrol Process* **15**: 3447–3459.
- Takeuchi N (2009) Temporal and spatial variations in spectral reflectance and characteristics of surface dust on Gulkana Glacier, Alaska Range. *J Glaciol* **55**: 701–709.
- Takeuchi N, Kohshima S & Segawa T (2003) Effect of cryoconite and snow algal communities on surface albedo on maritime glaciers in south Alaska. *Bull Glaciol Res* **20**: 21–27.
- Thomas-Hall SR, Turchetti B, Buzzini P, Branda E, Boekhout T, Theelen B & Watson K (2009) Cold-adapted yeasts from Antarctica and the Italian Alps—description of three novel species: *Mrakia robertii* sp. nov., *Mrakia blollopis* sp. nov. and *Mrakiella niccombsii* sp. nov. *Extremophiles* **14**: 47–59.
- Turchetti B, Buzzini P, Goretti M, Branda E, Diolaiuti G, D'Agata C, Smiraglia C & Vaughan-Martini A (2008) Psychrophilic yeasts in glacial environments of Alpine glaciers. *FEMS Microbiol Ecol* **63**: 73–83.
- Uetake J, Kohshima S, Nakazawa F, Takeuchi N, Fujita K, Miyake T, Narita H, Aizen V & Nakawo M (2011) Evidence for propagation of cold-adapted yeast in an ice core from a Siberian Altai glacier. *J Geophys Res* **116**: G01019. doi:10.1029/2010JG001337.
- Uzuka Y (1992) Yeasts as oligotrophic microorganisms; a new concept derived from soil yeast physiology (Japanese). *Chem Biol* **30**: 431–440.
